# Supplementary material for: Hepatitis B virus preS2Δ38–55 variants: A newly identified risk factor for hepatocellular carcinoma
Source: PubMed Central journal article supplement — JHEP Rep. 2020 Jul 11;2(5):100144. doi: 10.1016/j.jhepr.2020.100144 (PMC7452365; doi:10.1016/j.jhepr.2020.100144), 2020-07-11
Supplement: mmc2.pdf [file mmc2.pdf]

## JHEP Reports

### CTAT methods

Tables for a “Complete, Transparent, Accurate and Timely account” (CTAT) are now mandatory for all revised submissions. The aim is to enhance the reproducibility of methods.

- Only include the parts relevant to your study
- Refer to the CTAT in the main text as ‘Supplementary CTAT Table’
- Do not add subheadings
- Add as many rows as needed to include all information
- Only include one item per row

If the CTAT form is not relevant to your study, please outline the reasons why:

|  |
|--|
|  |
|--|

#### 1.1 Antibodies

| Name | Citation | Supplier | Cat no. | Clone no. |
|------|----------|----------|---------|-----------|
| NA   |          |          |         |           |

#### 1.2 Cell lines

| Name | Citation | Supplier | Cat no. | Passage no. | Authentication test method |
|------|----------|----------|---------|-------------|----------------------------|
| NA   |          |          |         |             |                            |

#### 1.3 Organisms

| Name | Citation | Supplier | Strain | Sex | Age | Overall n number |
|------|----------|----------|--------|-----|-----|------------------|
| NA   |          |          |        |     |     |                  |

#### 1.4 Sequence based reagents

| Name | Sequence | Supplier |
|------|----------|----------|
| NA   |          |          |

#### 1.5 Biological samples

| Description | Source   | Identifier                                                           |
|-------------|----------|----------------------------------------------------------------------|
| Serum       | patients | samples were coded on collection and handled anonymously in the lab. |

#### 1.6 Deposited data

| Name of repository | Identifier | Link |
|--------------------|------------|------|
| NA                 |            |      |

## 1.7 Software

| Software name                                           | Manufacturer                      | Version |
|---------------------------------------------------------|-----------------------------------|---------|
| SeqScape Software                                       | Thermo Fisher Scientific          | 3.0     |
| MAFFT (Multiple Alignment using Fast Fourier Transform) | Authors                           |         |
| CLC Sequence Viewer 8                                   | QIAGEN Bioinformatics             |         |
| jumping profile Hidden Markov Model                     | Authors                           |         |
| PhyML                                                   | Authors                           | 3.1     |
| GTR+G4 evolutionary model                               | ModelFinder                       |         |
| iTOL                                                    | Authors                           | 3.0     |
| Ion Torrent Suite Software                              | Thermoscience Fisher, Waltham, MA | 5.0.2.  |
| Integrated Genome Browser                               | Broad Institute                   | 2.3.55  |
| STATA                                                   | Stata Corporation, USA            | 13.0    |
| MACSE                                                   | Authors                           | 2.03    |
| BMGE                                                    | Authors                           | 1.0     |
| Torrent Variant Caller                                  | Thermoscience Fisher, Waltham, MA | 5.8     |

## 1.8 Other (e.g. drugs, proteins, vectors etc.)

|    |  |  |
|----|--|--|
| NA |  |  |
|----|--|--|

## 1.9 Please provide the details of the corresponding methods author for the manuscript:

Dr Isabelle Chemin  
 INSERM U1052, CNRS UMR5286, Centre de Recherche en Cancérologie de Lyon  
 Université Claude Bernard. 151 cours Albert Thomas, Lyon, France  
 Phone (Fax): 0033472681973 (71)  
 Mail: [isabelle.chemin@inserm.fr](mailto:isabelle.chemin@inserm.fr)

## 2.0 Please confirm for randomised controlled trials all versions of the clinical protocol are included in the submission. These will be published online as supplementary information.

|    |
|----|
| NA |
|----|
